# Supplementary material for: Limits to detecting epistasis in the fitness landscape of HIV
Source: PubMed Central journal article supplement (PMC8765623; doi:10.1371/journal.pone.0262314), 2022-01-18
Supplement: pone.0262314.s002.pdf [file pone.0262314.s002.pdf]

## Supplementary File 2

### Limits to detecting epistasis in the fitness landscape of HIV

Avik Biswas<sup>1,2</sup>, Allan Haldane<sup>1,2</sup>, Ronald M Levy<sup>1,2,3</sup>

<sup>1</sup>Department of Physics, Temple University, Philadelphia, PA

<sup>2</sup>Center for Biophysics and Computational Biology, Temple University, Philadelphia, PA

<sup>3</sup>Department of Chemistry, Temple University, Philadelphia, PA

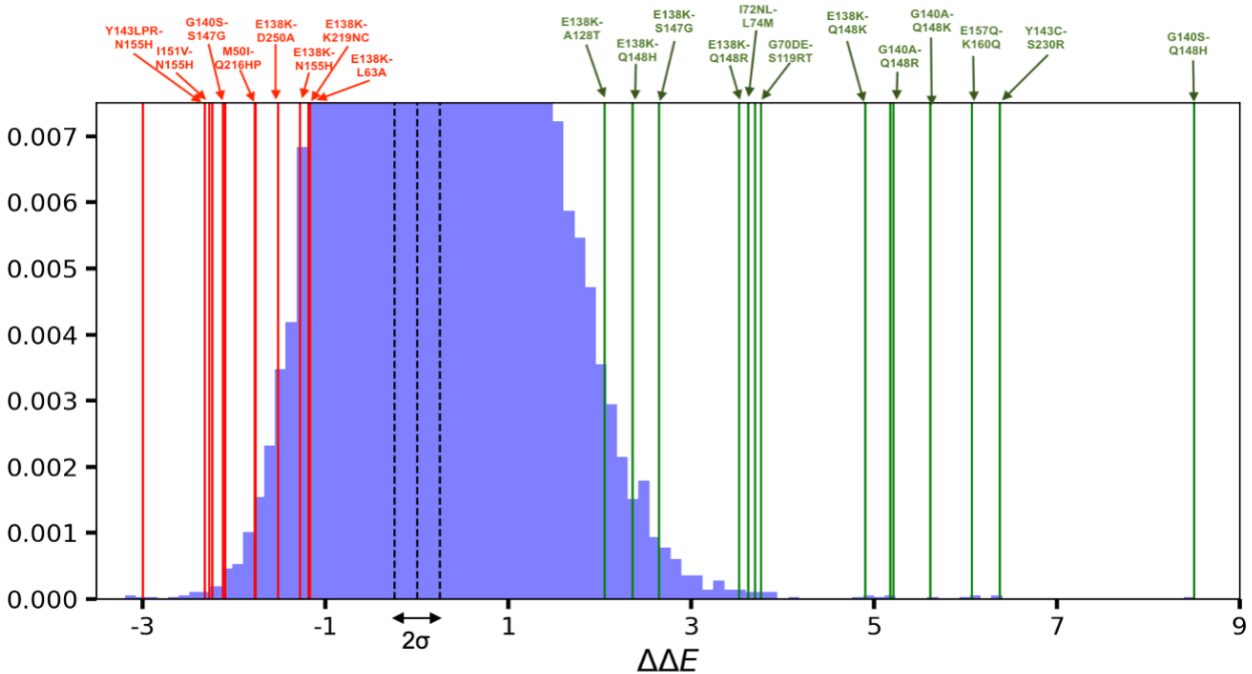

**Figure S2A:** Figure shows the distribution of Potts model predicted double mutant cycles ( $\Delta\Delta E$ ) in HIV-1 Integrase (blue) with respect to the NL4-3 background.  $\Delta\Delta E$  values above zero (0) indicate positive epistasis while  $\Delta\Delta E$  values below zero (0) indicate negative epistasis. The location of zero (0) and the standard deviations of  $\Delta\Delta E$  are shown as black 'dashed' lines. Some of the strongly interacting double mutations which involve drug-resistance mutations are indicated and labelled by colored lines; and are studied in the literature. Many of the strongest double mutant cycles captured by the Potts model are for drug-resistance mutations.

**Supplementary Table S2A: Potts model predicted strongest, positive double mutant cycle effects involving mutations (at least one amongst the pair) at drug-resistance-associated sites with corresponding literature references in HIV-1 Integrase.**

| Mutation pair    | Potts $\Delta\Delta E$ | Literature reference* |
|------------------|------------------------|-----------------------|
| G140S-Q148H      | 8.50879                | 1, 2, 3, 4, 5         |
| Y143C-S230R      | 6.37754                | 6                     |
| E157Q-K160Q      | 6.0882                 | ---                   |
| G140A-Q148K      | 5.61299                | 1, 2, 3, 4            |
| G140A-Q148R      | 5.2042                 | 1, 2, 3, 4            |
| G140A-Q148K      | 4.91495                | 1, 2, 3, 4            |
| E138K-Q148K      | 4.90052                | 5, 6, 7, 8            |
| G70DE-S119RT     | 3.76054                | ----                  |
| Y143ASGH - S230R | 3.7007                 | 6                     |
| I72NL-L74M       | 3.62676                | 9                     |
| E138K-Q148R      | 3.5258                 | 4, 6, 7, 8            |
| E138K-Q148H      | 2.3615                 | 4,6,7,8               |

\* Literature references are mentioned only for pairs where the coupled effect of the mutations is studied in literature.

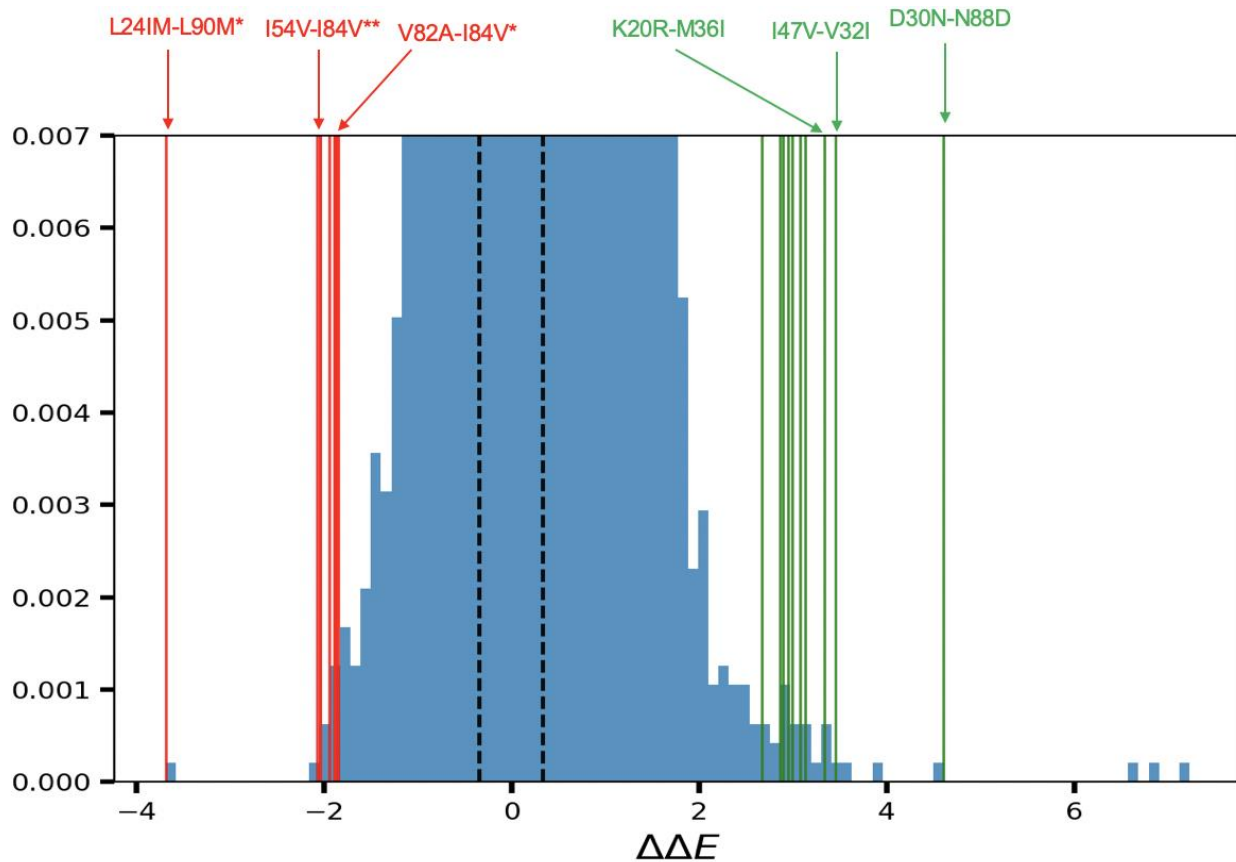

**Figure S2B:** Figure shows the distribution of Potts model predicted double mutant cycles ( $\Delta\Delta E$ ) in HIV-1 Protease (blue).  $\Delta\Delta E$  values above zero (0) indicate positive epistasis while  $\Delta\Delta E$  values below zero (0) indicate negative epistasis. The location of zero (0) and the standard deviations of  $\Delta\Delta E$  are shown as black 'dashed' lines. Some of the strongly interacting double mutations which involve drug-resistance mutations are indicated and labelled by colored lines; and are studied in the literature. Many of the strongest double mutant cycles captured by the Potts model are for drug-resistance.

**Supplementary Table S2B: Potts model predicted strongest, positive double mutant cycle effects involving mutations (at least one amongst the pair) at drug-resistance-associated sites with corresponding literature references in HIV-1 Protease.**

| <b>Mutation pair</b> | <b><i>Potts</i><br/><math>\Delta\Delta E</math></b> | <b>Literature<br/>reference*</b> |
|----------------------|-----------------------------------------------------|----------------------------------|
| D30N-N88D            | 4.61                                                | 10, 11, 13, 14                   |
| I47V—V32I            | 3.45                                                | 15, 16                           |
| K20R-M36I            | 3.33                                                | 17                               |
| G48VALMQ-I54ATS      | 3.14                                                | ---                              |
| D30N-K45Q            | 3.08                                                | ----                             |
| G16E-P39S            | 2.99                                                | ---                              |
| I54ATS-V82A          | 2.95                                                | 12, 13, 18                       |
| P39S-I62K            | 2.89                                                | ----                             |
| I54V-V82A            | 2.86                                                | 21                               |
| M46I-L76V            | 2.67                                                | 14, 19, 20                       |

\* Literature references are mentioned only for pairs where the coupled effect of the mutations is studied in literature.

## References:

1. Blanco, J.L., Varghese, V., Rhee, S.Y., Gatell, J.M. and Shafer, R.W., 2011. HIV-1 integrase inhibitor resistance and its clinical implications. *Journal of Infectious Diseases*, 203(9), pp.1204-1214.
2. Molina, J.M., LaMarca, A., Andrade-Villanueva, J., Clotet, B., Clumeck, N., Liu, Y.P., Zhong, L., Margot, N., Cheng, A.K. and Chuck, S.L., 2012. Efficacy and safety of once daily elvitegravir versus twice daily raltegravir in treatment-experienced patients with HIV-1 receiving a ritonavir-boosted protease inhibitor: randomised, double-blind, phase 3, non-inferiority study. *The Lancet infectious diseases*, 12(1), pp.27-35.
3. Garrido, C., Villacian, J., Zahonero, N., Pattery, T., Garcia, F., Gutierrez, F., Caballero, E., Van Houtte, M., Soriano, V. and de Mendoza, C., 2012. Broad phenotypic cross-resistance to elvitegravir in HIV-infected patients failing on raltegravir-containing regimens. *Antimicrobial agents and chemotherapy*, 56(6), pp.2873-2878.
4. Fransen, S., Gupta, S., Frantzell, A., Petropoulos, C.J. and Huang, W., 2012. Substitutions at amino acid positions 143, 148, and 155 of HIV-1 integrase define distinct genetic barriers to raltegravir resistance in vivo. *Journal of virology*, 86(13), pp.7249-7255.
5. Cook, N.J., Li, W., Berta, D., Badaoui, M., Ballandras-Colas, A., Nans, A., Kotecha, A., Rosta, E., Engelman, A.N. and Cherepanov, P., 2020. Structural basis of second-generation HIV integrase inhibitor action and viral resistance. *Science*, 367(6479), pp.806-810.
6. Eron, J.J., Clotet, B., Durant, J., Katlama, C., Kumar, P., Lazzarin, A., Poizot-Martin, I., Richmond, G., Soriano, V., Ait-Khaled, M. and Fujiwara, T., 2013. Safety and efficacy of dolutegravir in treatment-experienced subjects with raltegravir-resistant HIV type 1 infection: 24-week results of the VIKING Study. *The Journal of infectious diseases*, 207(5), pp.740-748.
7. Canducci, F., Ceresola, E.R., Boeri, E., Spagnuolo, V., Cossarini, F., Castagna, A., Lazzarin, A. and Clementi, M., 2011. Cross-resistance profile of the novel integrase inhibitor Dolutegravir (S/GSK1349572) using clonal viral variants selected in patients failing raltegravir. *Journal of Infectious Diseases*, 204(11), pp.1811-1815.
8. Cahn, P., Pozniak, A.L., Mingrone, H., Shuldyakov, A., Brites, C., Andrade-Villanueva, J.F., Richmond, G., Buendia, C.B., Fourie, J., Ramgopal, M. and Hagins, D., 2013. Dolutegravir versus raltegravir in antiretroviral-experienced, integrase-inhibitor-naive adults with HIV: week 48 results from the randomised, double-blind, non-inferiority SAILING study. *The Lancet*, 382(9893), pp.700-708.
9. Kobayashi, M., Nakahara, K., Seki, T., Miki, S., Kawauchi, S., Suyama, A., Wakasa-Morimoto, C., Kodama, M., Endoh, T., Oosugi, E. and Matsushita, Y., 2008. Selection of diverse and clinically relevant integrase inhibitor-resistant human immunodeficiency virus type 1 mutants. *Antiviral research*, 80(2), pp.213-222.
10. Atkinson, B., Isaacson, J., Knowles, M., Mazabel, E. and Patick, A.K., 2000. Correlation between human immunodeficiency virus genotypic resistance and virologic response in patients receiving nelfinavir monotherapy or nelfinavir with lamivudine and zidovudine. *The Journal of infectious diseases*, 182(2), pp.420-427.
11. Patick, A.K., Duran, M., Cao, Y., Shugarts, D., Keller, M.R., Mazabel, E., Knowles, M., Chapman, S., Kuritzkes, D.R. and Markowitz, M., 1998. Genotypic and phenotypic characterization of human immunodeficiency virus type 1 variants isolated from patients treated with the protease inhibitor nelfinavir. *Antimicrobial Agents and Chemotherapy*, 42(10), pp.2637-2644.
12. Podzamczar, D., Ferrer, E., Consiglio, E., Gatell, J.M., Perez, P., Perez, J.L., Luna, E., González, A., Pedrol, E., Lozano, L. and Ocaña, I., 2002. A randomized clinical trial comparing nelfinavir or nevirapine associated to zidovudine/lamivudine in HIV-infected naive patients (the Combine Study). *Antiviral therapy*, 7(2), pp.81-90.
13. Fitzgibbon, J.E., Gaur, S., Walsman, S.M., Janahi, M., Whitley-Williams, P., and John, J.F. Jr., 2001. Emergence of drug resistance mutations in a group of HIV-infected children taking nelfinavir-containing regimens. *AIDS Res Hum Retroviruses*, 17(14),1321-1328.
14. Rhee, S.Y., Taylor, J., Fessel, W.J., Kaufman, D., Towner, W., Troia, P., Ruane, P., Hellinger, J., Shirvani, V., Zolopa, A. and Shafer, R.W., 2010. HIV-1 protease mutations and protease inhibitor cross-resistance. *Antimicrobial agents and chemotherapy*, 54(10), pp.4253-4261.
15. Rhee, S.Y., Liu, T.F., Holmes, S.P. and Shafer, R.W., 2007. HIV-1 subtype B protease and reverse transcriptase amino acid covariation. *PLoS Comput Biol*, 3(5), p.e87.

16. Kagan, R.M., Shenderovich, M.D., Heseltine, P.N. and Ramnarayan, K., 2005. Structural analysis of an HIV-1 protease I47A mutant resistant to the protease inhibitor lopinavir. *Protein science*, 14(7), pp.1870-1878.
17. Nijhuis, M., Schuurman, R., De Jong, D., Erickson, J., Gustchina, E., Albert, J., Schipper, P., Gulnik, S. and Boucher, C.A., 1999. Increased fitness of drug resistant HIV-1 protease as a result of acquisition of compensatory mutations during suboptimal therapy. *Aids*, 13(17), pp.2349-2359.
18. van Westen, G.J., Hendriks, A., Wegner, J.K., IJzerman, A.P., van Vlijmen, H.W. and Bender, A., 2013. Significantly improved HIV inhibitor efficacy prediction employing proteochemometric models generated from antivirogram data. *PLoS Comput Biol*, 9(2), p.e1002899.
19. Henderson, G.J., Lee, S.K., Irlbeck, D.M., Harris, J., Kline, M., Pollom, E., Parkin, N. and Swanstrom, R., 2012. Interplay between single resistance-associated mutations in the HIV-1 protease and viral infectivity, protease activity, and inhibitor sensitivity. *Antimicrobial agents and chemotherapy*, 56(2), pp.623-633.
20. Naeger, L.K. and Struble, K.A., 2007. Food and Drug Administration analysis of tipranavir clinical resistance in HIV-1-infected treatment-experienced patients. *Aids*, 21(2), pp.179-185.
21. Bethell, R., Scherer, J., Witvrouw, M., Paquet, A., Coakley, E. and Hall, D., 2012. Phenotypic protease inhibitor resistance and cross-resistance in the clinic from 2006 to 2008 and mutational prevalences in HIV from patients with discordant tipranavir and darunavir susceptibility phenotypes. *AIDS research and human retroviruses*, 28(9), pp.1019-1024.
